# Supplementary material
Source: PubMed Central journal article supplement (PMC3612009)

## **SUPPLEMENTARY MATERIALS**

### **Supplemental tables**

**Table S1.** Population characteristics of studies included in DietGen by cohort.

| Study            | Female (%) | Age (y)    | BMI (kg/m <sup>2</sup> ) | Total Energy Intake (kcal) | % kcals from Carbohydrates | % kcals from Protein | % kcals from Fat |
|------------------|------------|------------|--------------------------|----------------------------|----------------------------|----------------------|------------------|
| <b>HPFS</b>      |            |            |                          |                            |                            |                      |                  |
| T2D Cohort Cases | 0          | 55.0 (8.5) | 27.6 (4.0)               | 2057.1 (627.4)             | 45.7 (15.5)                | 18.5 (6.5)           | 34.5 (12.4)      |
| N=2315 Controls  | 0          | 55.0 (8.4) | 25.0 (2.7)               | 2038.0 (611.7)             | 47.8 (16.3)                | 18.4 (5.7)           | 32.6 (11.5)      |
| CHD Cohort Cases | 0          | 56.4 (8.7) | 25.7 (3.0)               | 2063.1 (655.0)             | 48.7 (16.6)                | 18.9 (5.7)           | 33.2 (10.5)      |
| N=1212 Controls  | 0          | 56.2 (8.6) | 25.2 (3.1)               | 2020.9 (613.8)             | 48.2 (16.8)                | 19.0 (6.8)           | 32.9 (12.4)      |
| KS Cohort Cases  | 0          | 49.4 (7.9) | 25.3 (2.8)               | 1961.5 (589.3)             | 48.7 (16.3)                | 19.0 (6.9)           | 34.2 (13.9)      |
| N=549 Controls   | 0          | 48.7 (6.8) | 25.5 (2.8)               | 2040.4 (584.5)             | 46.8 (15.6)                | 18.2 (5.5)           | 33.0 (11.0)      |
| <b>NHS</b>       |            |            |                          |                            |                            |                      |                  |
| T2D Cohort Cases | 100        | 53.6 (6.7) | 27.8 (7.8)               | 1803.4 (541.1)             | 48.3 (7.5)                 | 19.3 (3.4)           | 33.1 (5.7)       |
| N=3218 Controls  | 100        | 53.2 (6.7) | 24.0 (6.2)               | 1780.0 (514.9)             | 48.2 (7.8)                 | 18.7 (3.2)           | 32.9 (5.6)       |
| CHD Cohort Cases | 100        | 56.1 (6.3) | 26.4 (5.2)               | 1820.1 (543.9)             | 48.1 (7.7)                 | 18.8 (3.4)           | 32.9 (5.8)       |
| N=1013 Controls  | 100        | 56.0 (6.3) | 24.9 (4.3)               | 1765.7 (520.3)             | 47.8 (8.0)                 | 18.7 (3.3)           | 32.7 (5.8)       |
| KS Cohort Cases  | 100        | 52.2 (4.4) | 25.1 (5.4)               | 1815.1 (564.1)             | 47.9 (7.4)                 | 18.5 (3.3)           | 34.0 (6.1)       |
| N=490 Controls   | 100        | 52.0 (3.7) | 23.3 (4.5)               | 1770.5 (502.4)             | 48.4 (7.5)                 | 18.5 (2.8)           | 33.2 (5.6)       |
| BC Cohort Cases  | 100        | 54.4 (6.4) | 25.2 (4.7)               | 1769.7 (512.6)             | 47.9 (7.9)                 | 18.8 (3.2)           | 32.4 (5.7)       |
| N=2043 Controls  | 100        | 54.5 (6.4) | 25.0 (4.5)               | 1781.3 (502.1)             | 48.7 (7.8)                 | 18.7 (3.3)           | 32.4 (5.8)       |
| <b>WGHS</b>      |            |            |                          |                            |                            |                      |                  |
| N=22691 Cohort   | 100        | 54.7 (7.1) | 25.9 (5.0)               | 1732.4 (524.9)             | 51.0 (8.0)                 | 18.9 (3.3)           | 30.0 (6.1)       |

Abbreviations: HPFS, Health Professionals' Follow-up Study; NHS, Nurses' Health Study; WGHS, Women's Genome Health Study; T2D, type 2 diabetes; CHD, coronary heart disease; KS, kidney stone; BC, breast cancer; BMI, body mass index; MET, metabolic equivalent of task; HRT, hormone replacement therapy

**Table S1. cont.**

| Study       |          | Current Smoking<br>(%, n) | Alcohol Use<br>(g/day) | Exercise<br>(METs/wk) | Menopause<br>(%,n) | HRT user<br>(%,n) |
|-------------|----------|---------------------------|------------------------|-----------------------|--------------------|-------------------|
| <b>HPFS</b> |          |                           |                        |                       |                    |                   |
| T2D Cohort  | Cases    | 11.8 (139)                | 11.3 (16.3)            | 14.6 (18.7)           | NA                 | NA                |
|             | Controls | 7.2 (94)                  | 12.0 (15.2)            | 21.1 (25.2)           | NA                 | NA                |
| CHD Cohort  | Cases    | 10.8 (47)                 | 11.2 (15.9)            | 18.3 (23.1)           | NA                 | NA                |
|             | Controls | 10.3 (90)                 | 13.3 (16.4)            | 20.0 (27.0)           | NA                 | NA                |
| KS Cohort   | Cases    | 2.3 (23)                  | 8.8 (13.0)             | 22.3 (41.2)           | NA                 | NA                |
|             | Controls | 3.4 (24)                  | 14.0 (18.2)            | 24.4 (41.3)           | NA                 | NA                |
| <b>NHS</b>  |          |                           |                        |                       |                    |                   |
| T2D Cohort  | Cases    | 17.5 (268)                | 4.0 (9.5)              | 11.9 (15.4)           | 84.8 (1297)        | 8.5 (130)         |
|             | Controls | 10.3 (90)                 | 6.4 (10.4)             | 14.2 (18.6)           | 81.7 (1428)        | 6.5 (114)         |
| CHD Cohort  | Cases    | 30.6 (154)                | 5.7 (10.0)             | 14.4 (21.3)           | 91.2 (453)         | 0 (0)             |
|             | Controls | 28.5 (290)                | 7.5 (12.2)             | 14.3 (19.2)           | 89.6 (917)         | 0 (0)             |
| KS Cohort   | Cases    | 6.7 (66)                  | 4.3 (7.6)              | 14.8 (19.4)           | 76.7 (302)         | 0 (0)             |
|             | Controls | 5.6(39)                   | 5.3 (8.7)              | 12.5 (13.9)           | 72.4 (165)         | 0 (0)             |
| BC Cohort   | Cases    | 17.7 (203)                | 7.8 (12.4)             | 14.5 (18.2)           | 87.0 (996)         | 0 (0)             |
|             | Controls | 13.0 (148)                | 6.5 (10.3)             | 16.0 (26.2)           | 87.2 (996)         | 0 (0)             |
| <b>WGHS</b> | Cohort   | 11.0 (2710)               | 4.3 (8.4)              | 14.7 (18.4)           | 54.3 (12660)       | 43.8 (10197)      |

**Table S2.** Genome-wide and sub-genome-wide association results from discovery (DietGen) meta-analysis, and replication (CHARGE), and combined joint meta-analysis for percentage of total caloric intake from macronutrients (carbohydrates, protein, and fat), sorted by P-value (P(2GC)) and regression model for association in the discovery cohort.

| Model                | SNPID           | Nearest Gene   | Chr           | BP        | EA        | non EA | EAF   | DietGen     |         |         |                |     |  |
|----------------------|-----------------|----------------|---------------|-----------|-----------|--------|-------|-------------|---------|---------|----------------|-----|--|
|                      |                 |                |               |           |           |        |       | $\beta$ (%) | SE      | P(2GC)  | I <sup>2</sup> |     |  |
| <b>Carbohydrates</b> |                 |                |               |           |           |        |       |             |         |         |                |     |  |
| <b>Model 1*</b>      | rs10163409      | <i>FTO</i>     | 16            | 52696381  | a         | t      | 0.69  | 0.441       | 0.075   | 7.4E-09 | 8.7            |     |  |
|                      | rs6558687       | <i>CSMD1</i>   | 8             | 2591594   | t         | g      | 0.07  | 0.653       | 0.131   | 9.1E-07 | 30.9           |     |  |
|                      | rs197273        | <i>TANK</i>    | 2             | 161602909 | a         | g      | 0.48  | 0.309       | 0.064   | 2.4E-06 | 0.0            |     |  |
|                      | rs133055        | <i>MKLI</i>    | 22            | 39380817  | a         | g      | 0.35  | 0.317       | 0.067   | 2.9E-06 | 0.0            |     |  |
|                      | rs703058        | <i>CUBN</i>    | 10            | 16916058  | t         | g      | 0.14  | -0.481      | 0.102   | 3.2E-06 | 0.0            |     |  |
|                      | rs7689746       | <i>PDLIM5</i>  | 4             | 95793146  | a         | g      | 0.24  | -0.357      | 0.076   | 3.5E-06 | 0.0            |     |  |
|                      | rs2970933       | <i>DPP4</i>    | 2             | 162562522 | t         | c      | 0.39  | -0.316      | 0.067   | 4.0E-06 | 0.0            |     |  |
|                      | rs13065635      | <i>ARGFX</i>   | 3             | 122785100 | t         | g      | 0.13  | -0.493      | 0.108   | 6.5E-06 | 11.4           |     |  |
| rs1512130            | <i>GABRA4</i>   | 4              | 46647228      | a         | g         | 0.33   | 0.304 | 0.068       | 9.5E-06 | 16.0    |                |     |  |
| <b>Model 2†</b>      | rs10163409      | <i>FTO</i>     | 16            | 52696381  | a         | t      | 0.69  | 0.420       | 0.075   | 3.4E-08 | 19.9           |     |  |
|                      | rs197273        | <i>TANK</i>    | 2             | 161602909 | a         | g      | 0.48  | 0.310       | 0.064   | 2.0E-06 | 0.0            |     |  |
|                      | rs2014821       | <i>ITGA8</i>   | 10            | 15588753  | a         | g      | 0.11  | 0.493       | 0.106   | 4.2E-06 | 0.0            |     |  |
|                      | rs13065635      | <i>ARGFX</i>   | 3             | 122785100 | t         | g      | 0.13  | -0.501      | 0.108   | 4.6E-06 | 26.4           |     |  |
|                      | rs2970933       | <i>DPP4</i>    | 2             | 162562522 | t         | c      | 0.39  | -0.312      | 0.067   | 5.0E-06 | 0.0            |     |  |
|                      | rs6558687       | <i>CSMD1</i>   | 8             | 2591594   | t         | g      | 0.07  | 0.605       | 0.131   | 5.2E-06 | 40.2           |     |  |
|                      | rs139920        | <i>TNRC6B</i>  | 22            | 39056695  | t         | c      | 0.51  | -0.299      | 0.065   | 5.4E-06 | 0.0            |     |  |
|                      | rs2896655       | <i>KCNQ3</i>   | 8             | 133354156 | a         | g      | 0.11  | -0.454      | 0.099   | 6.5E-06 | 0.0            |     |  |
|                      | rs7689746       | <i>PDLIM5</i>  | 4             | 95793146  | a         | g      | 0.24  | -0.345      | 0.076   | 7.3E-06 | 0.0            |     |  |
|                      | rs589064        | <i>KATNALI</i> | 13            | 29589808  | c         | g      | 0.39  | 0.306       | 0.068   | 8.3E-06 | 0.0            |     |  |
|                      | <b>Protein</b>  |                |               |           |           |        |       |             |         |         |                |     |  |
|                      | <b>Model 1*</b> | rs7958151      | <i>GPR133</i> | 12        | 130183588 | a      | c     | 0.38        | 0.138   | 0.025   | 9.6E-08        | 7.9 |  |
|                      |                 | rs17158276     | <i>PRR15</i>  | 7         | 29614602  | t      | c     | 0.86        | -0.172  | 0.036   | 2.4E-06        | 0.0 |  |
|                      |                 | rs1039755      | <i>BUD13</i>  | 11        | 115889336 | t      | c     | 0.70        | 0.136   | 0.029   | 3.6E-06        | 9.5 |  |
|                      |                 | rs1440620      | <i>PROX1</i>  | 1         | 212327973 | t      | c     | 0.65        | -0.158  | 0.035   | 7.6E-06        | 0.0 |  |
| rs152621             |                 | <i>FAM105A</i> | 5             | 14636006  | a         | g      | 0.18  | 0.145       | 0.032   | 8.4E-06 | 0.0            |     |  |
| rs1457974            |                 | <i>IMPG1</i>   | 6             | 77481181  | a         | g      | 0.34  | -0.114      | 0.025   | 9.1E-06 | 0.0            |     |  |
| rs7958151            |                 | <i>GPR133</i>  | 12            | 130183588 | a         | c      | 0.38  | 0.131       | 0.025   | 3.8E-07 | 5.2            |     |  |
| <b>Model 2†</b>      | rs1039755       | <i>BUD13</i>   | 11            | 115889336 | t         | c      | 0.70  | 0.145       | 0.029   | 7.7E-07 | 15.1           |     |  |
|                      | rs838133        | <i>FGF21</i>   | 19            | 53951341  | a         | g      | 0.45  | -0.124      | 0.026   | 2.3E-06 | 29.2           |     |  |
|                      | rs17810895      | <i>PRR15</i>   | 7             | 29581016  | c         | g      | 0.07  | 0.220       | 0.046   | 2.5E-06 | 0.0            |     |  |
|                      | rs152621        | <i>FAM105A</i> | 5             | 14636006  | a         | g      | 0.18  | 0.148       | 0.032   | 5.0E-06 | 0.0            |     |  |
|                      | rs1440620       | <i>PROX1</i>   | 1             | 212327973 | t         | c      | 0.65  | -0.159      | 0.035   | 7.0E-06 | 0.0            |     |  |
|                      | <b>Fat</b>      |                |               |           |           |        |       |             |         |         |                |     |  |
| <b>Model 1*</b>      | rs6598192       | <i>EP400</i>   | 12            | 131095602 | t         | c      | 0.92  | -0.480      | 0.104   | 5.2E-06 | 0.0            |     |  |
|                      | rs10789371      | <i>EDN2</i>    | 1             | 41711015  | a         | g      | 0.30  | 0.248       | 0.054   | 6.2E-06 | 19.1           |     |  |
| <b>Model 2†</b>      | rs10789371      | <i>EDN2</i>    | 1             | 41711015  | a         | g      | 0.30  | 0.251       | 0.054   | 4.9E-06 | 18.7           |     |  |
|                      | rs6598192       | <i>EP400</i>   | 12            | 131095602 | t         | c      | 0.92  | -0.465      | 0.104   | 9.9E-06 | 0.0            |     |  |

Table S2. cont.

| Model                | SNPID          | CHARGE      |       |         |         |                | Joint analysis |       |         |       |
|----------------------|----------------|-------------|-------|---------|---------|----------------|----------------|-------|---------|-------|
|                      |                | $\beta$ (%) | SE    | P(2GC)  | 1sidedP | I <sup>2</sup> | $\beta$ (%)    | SE    | P       | N     |
| <b>Carbohydrates</b> |                |             |       |         |         |                |                |       |         |       |
| <b>Model 1*</b>      | rs10163409     | -0.029      | 0.069 | 6.9E-01 | 3.5E-02 | 34.8           | 0.188          | 0.051 | 2.2E-04 | 71885 |
|                      | rs6558687      | 0.016       | 0.117 | 8.9E-01 | 5.9E-02 | 23.9           | 0.300          | 0.087 | 6.0E-04 | 71802 |
|                      | rs197273       | 0.141       | 0.058 | 1.8E-02 | 2.9E-02 | 0.0            | 0.217          | 0.043 | 5.4E-07 | 71887 |
|                      | rs133055       | 0.066       | 0.060 | 2.8E-01 | 3.0E-02 | 45.5           | 0.178          | 0.045 | 6.4E-05 | 71773 |
|                      | rs703058       | 0.065       | 0.085 | 4.6E-01 | 4.3E-02 | 6.8            | -0.161         | 0.065 | 1.4E-02 | 71888 |
|                      | rs7689746      | 0.165       | 0.072 | 2.5E-02 | 3.6E-02 | 16.9           | -0.084         | 0.052 | 1.1E-01 | 69585 |
|                      | rs2970933      | 0.040       | 0.061 | 5.2E-01 | 3.0E-02 | 0.8            | -0.120         | 0.045 | 7.9E-03 | 71888 |
|                      | rs13065635     | 0.094       | 0.091 | 3.1E-01 | 4.6E-02 | 0.0            | -0.151         | 0.070 | 3.0E-02 | 71883 |
|                      | rs1512130      | -0.033      | 0.060 | 5.9E-01 | 3.0E-02 | 24.7           | 0.116          | 0.045 | 1.0E-02 | 71879 |
| <b>Model 2†</b>      | rs10163409     | -0.052      | 0.070 | 4.6E-01 | 3.5E-02 | 32.3           | 0.166          | 0.051 | 1.1E-03 | 71326 |
|                      | rs197273       | 0.165       | 0.058 | 5.7E-03 | 2.9E-02 | 0.0            | 0.231          | 0.043 | 9.6E-08 | 71328 |
|                      | rs2014821      | -0.055      | 0.096 | 5.8E-01 | 4.8E-02 | 0.0            | 0.194          | 0.071 | 6.4E-03 | 71329 |
|                      | rs13065635     | 0.054       | 0.091 | 5.7E-01 | 4.6E-02 | 0.0            | -0.178         | 0.070 | 1.1E-02 | 71324 |
|                      | rs2970933      | 0.006       | 0.061 | 9.2E-01 | 3.0E-02 | 15.9           | -0.137         | 0.045 | 2.5E-03 | 71329 |
|                      | rs6558687      | -0.020      | 0.117 | 8.7E-01 | 5.9E-02 | 37.6           | 0.259          | 0.087 | 3.0E-03 | 71243 |
|                      | rs139920       | -0.086      | 0.063 | 1.8E-01 | 3.1E-02 | 1.0            | -0.189         | 0.045 | 2.7E-05 | 69024 |
|                      | rs2896655      | -0.082      | 0.090 | 3.8E-01 | 4.5E-02 | 0.0            | -0.250         | 0.067 | 1.7E-04 | 71279 |
|                      | rs7689746      | 0.184       | 0.072 | 1.3E-02 | 3.6E-02 | 9.7            | -0.069         | 0.052 | 1.9E-01 | 69026 |
|                      | rs589064       | 0.059       | 0.059 | 3.2E-01 | 2.9E-02 | 0.0            | 0.165          | 0.044 | 1.9E-04 | 71327 |
|                      | <b>Protein</b> |             |       |         |         |                |                |       |         |       |
| <b>Model 1*</b>      | rs7958151      | 0.016       | 0.026 | 5.4E-01 | 1.3E-02 | 0.0            | 0.079          | 0.018 | 1.4E-05 | 71764 |
|                      | rs17158276     | 0.073       | 0.036 | 5.1E-02 | 1.8E-02 | 0.0            | -0.052         | 0.026 | 4.4E-02 | 71889 |
|                      | rs1039755      | -0.044      | 0.036 | 2.4E-01 | 1.8E-02 | 0.0            | 0.066          | 0.023 | 3.2E-03 | 62060 |
|                      | rs1440620      | -0.067      | 0.034 | 5.6E-02 | 1.7E-02 | 0.0            | -0.112         | 0.024 | 4.3E-06 | 68633 |
|                      | rs152621       | -0.011      | 0.034 | 7.7E-01 | 1.7E-02 | 1.1            | 0.073          | 0.023 | 1.9E-03 | 69538 |
|                      | rs1457974      | -0.021      | 0.026 | 4.4E-01 | 1.3E-02 | 41.2           | -0.069         | 0.018 | 1.5E-04 | 71890 |
|                      | rs7958151      | 0.007       | 0.026 | 8.0E-01 | 1.3E-02 | 0.0            | 0.071          | 0.018 | 9.2E-05 | 71151 |
| <b>Model 2†</b>      | rs1039755      | -0.037      | 0.038 | 3.4E-01 | 1.9E-02 | 0.0            | 0.078          | 0.023 | 6.3E-04 | 68028 |
|                      | rs838133       | -0.098      | 0.030 | 1.5E-03 | 1.5E-02 | 48.7           | -0.113         | 0.020 | 7.9E-09 | 68968 |
|                      | rs17810895     | -0.076      | 0.047 | 1.2E-01 | 2.4E-02 | 0.0            | 0.077          | 0.033 | 2.0E-02 | 71263 |
|                      | rs152621       | -0.008      | 0.034 | 8.1E-01 | 1.7E-02 | 0.0            | 0.075          | 0.023 | 1.2E-03 | 68925 |
|                      | rs1440620      | -0.078      | 0.032 | 1.8E-02 | 1.6E-02 | 0.0            | -0.116         | 0.024 | 1.0E-06 | 61460 |
| <b>Fat</b>           |                |             |       |         |         |                |                |       |         |       |
| <b>Model 1*</b>      | rs6598192      | -0.026      | 0.128 | 8.4E-01 | 6.4E-02 | 0.0            | -0.299         | 0.081 | 2.1E-04 | 59982 |
|                      | rs10789371     | -0.010      | 0.052 | 8.5E-01 | 2.6E-02 | 0.0            | 0.113          | 0.037 | 2.5E-03 | 71880 |
| <b>Model 2†</b>      | rs10789371     | -0.014      | 0.052 | 8.0E-01 | 2.6E-02 | 0.0            | 0.112          | 0.037 | 2.7E-03 | 71267 |
|                      | rs6598192      | -0.041      | 0.128 | 7.6E-01 | 6.4E-02 | 0.0            | -0.297         | 0.081 | 2.3E-04 | 59390 |

\* Model 1 adjusts for age, sex (if applicable), location and sub-population stratification

† Model 2 adjusts for model 1 covariates in addition to BMI (kg/m<sup>2</sup>)

Abbreviations: CHARGE, Cohorts for Heart and Aging Research in Genomic

Epidemiology Consortium; SNP, single nucleotide polymorphism; CHR, chromosome;

BP, base pair position – build 36; EA, effect allele; nonEA, non-effect allele; EAF, effect

allele frequency;  $\beta$ , beta-coefficient; SE, standard error; P(2GC), p-value doubly

corrected for genomic control; 1sidedP, one-sided p-value; P, p-value; N, sample size

**Table S3.** Secondary macronutrient intake associations in DietGen (HPFS/NHS/WGHS) for SNPs with genome-wide associations for macronutrient intake from discovery or joint meta-analysis.

| SNP               | Model    | Gene         | Chr | Carbohydrates |      |         | Protein   |      |         | Fat       |      |         |
|-------------------|----------|--------------|-----|---------------|------|---------|-----------|------|---------|-----------|------|---------|
|                   |          |              |     | $\beta\%$     | SE   | P       | $\beta\%$ | SE   | P       | $\beta\%$ | SE   | P       |
| <b>rs197273</b>   |          | <i>TANK</i>  | 2   |               |      |         |           |      |         |           |      |         |
|                   | Model 1* |              |     | 0.31          | 0.06 | 2.4E-06 | -0.05     | 0.02 | 6.8E-02 | -0.16     | 0.05 | 1.4E-03 |
|                   | Model 2† |              |     | 0.31          | 0.06 | 2.0E-06 | -0.04     | 0.02 | 8.6E-02 | -0.17     | 0.05 | 7.8E-04 |
| <b>rs10163409</b> |          | <i>FTO</i>   | 16  |               |      |         |           |      |         |           |      |         |
|                   | Model 1* |              |     | 0.44          | 0.08 | 7.4E-09 | -0.05     | 0.03 | 6.1E-02 | -0.23     | 0.06 | 6.1E-05 |
|                   | Model 2† |              |     | 0.42          | 0.07 | 3.4E-08 | -0.05     | 0.03 | 8.0E-02 | -0.22     | 0.06 | 1.6E-04 |
| <b>rs838133</b>   |          | <i>FGF21</i> | 19  |               |      |         |           |      |         |           |      |         |
|                   | Model 1* |              |     | 0.22          | 0.07 | 1.3E-03 | -0.12     | 0.03 | 1.1E-05 | -0.22     | 0.05 | 3.5E-05 |
|                   | Model 2† |              |     | 0.23          | 0.07 | 5.9E-04 | -0.12     | 0.03 | 2.3E-06 | -0.21     | 0.05 | 7.1E-05 |

\* Model 1 adjusts for age, sex, location and sub-population stratification

† Model 2 adjusts for model 1 covariates in addition to BMI (kg/m<sup>2</sup>)

Abbreviations: SNP, single nucleotide polymorphism; CHR, chromosome;  $\beta$ , beta-coefficient; SE, standard error; P, p-value; N, sample size

**Table S4.** Estimates of variance in percentage of caloric intake from carbohydrates, protein and fat explained by 339,596 genotyped SNPs with MAF>1% (top panel) and 326,504 genotyped SNPs with MAF>5% (bottom panel) from the WGHS.

| MAF>0.01             | Univariate |       |         | Model 1* |       |         | Model 2† |       |         |
|----------------------|------------|-------|---------|----------|-------|---------|----------|-------|---------|
|                      | $h^2$      | SE    | P       | $h^2$    | SE    | P       | $h^2$    | SE    | P       |
| <b>Carbohydrates</b> | 0.066      | 0.021 | 9.1E-05 | 0.066    | 0.021 | 1.2E-04 | 0.061    | 0.021 | 2.9E-04 |
| <b>Protein</b>       | 0.081      | 0.022 | 2.7E-05 | 0.081    | 0.022 | 1.5E-05 | 0.081    | 0.022 | 2.6E-05 |
| <b>Fats</b>          | 0.073      | 0.022 | 3.8E-05 | 0.067    | 0.022 | 2.3E-04 | 0.061    | 0.022 | 8.1E-04 |

  

| MAF>0.05             | Univariate |       |         | Model 1* |       |         | Model 2† |       |         |
|----------------------|------------|-------|---------|----------|-------|---------|----------|-------|---------|
|                      | $h^2$      | SE    | P       | $h^2$    | SE    | P       | $h^2$    | SE    | P       |
| <b>Carbohydrates</b> | 0.062      | 0.021 | 1.4E-04 | 0.062    | 0.021 | 2.1E-04 | 0.057    | 0.021 | 5.5E-04 |
| <b>Protein</b>       | 0.080      | 0.022 | 2.4E-05 | 0.080    | 0.022 | 1.4E-05 | 0.079    | 0.022 | 2.4E-05 |
| <b>Fats</b>          | 0.070      | 0.021 | 5.1E-05 | 0.064    | 0.021 | 3.2E-04 | 0.057    | 0.021 | 1.3E-03 |

\* Model 1 adjusts for age, sex, location and sub-population stratification

† Model 2 adjusts for model 1 covariates in addition to BMI (kg/m<sup>2</sup>)

Abbreviations:  $h^2$ , proportion of variance explained or heritability; SE, standard error; P, p value



## Supplemental figures

**Figure S1.** Forest plot of the effect of rs10163409 in *FTO* on percentage of total energy intake from carbohydrates in a fixed-effects meta-analysis of 33,388 men and women of European ancestry in models with (a) and without adjustment for BMI (b). Studies are listed in ascending order by sample size starting with the smallest study (NHS kidney stone controls) to the largest (WGHS). The beta represents the percentage of total energy intake from carbohydrates per “A” allele of rs10163409.

a.

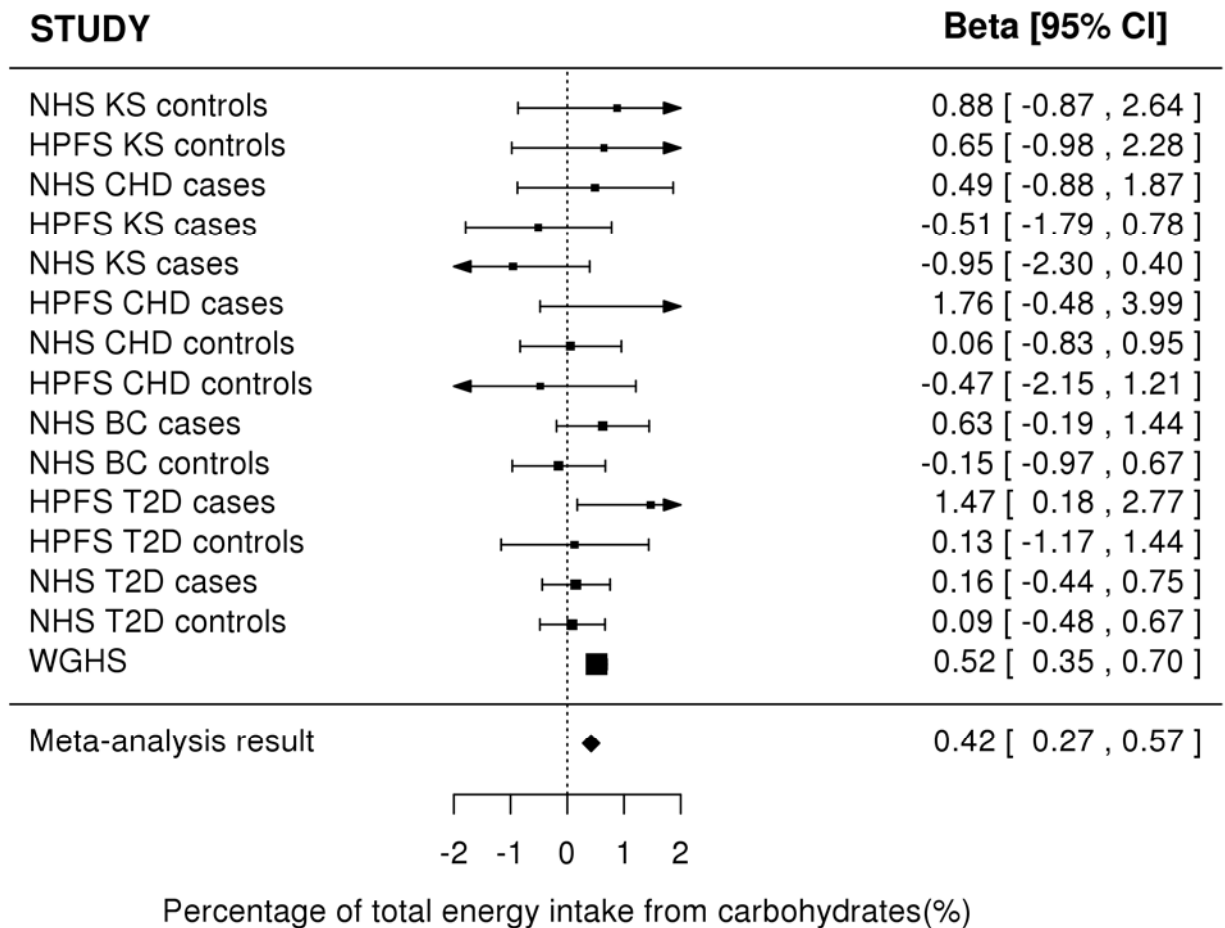

b.

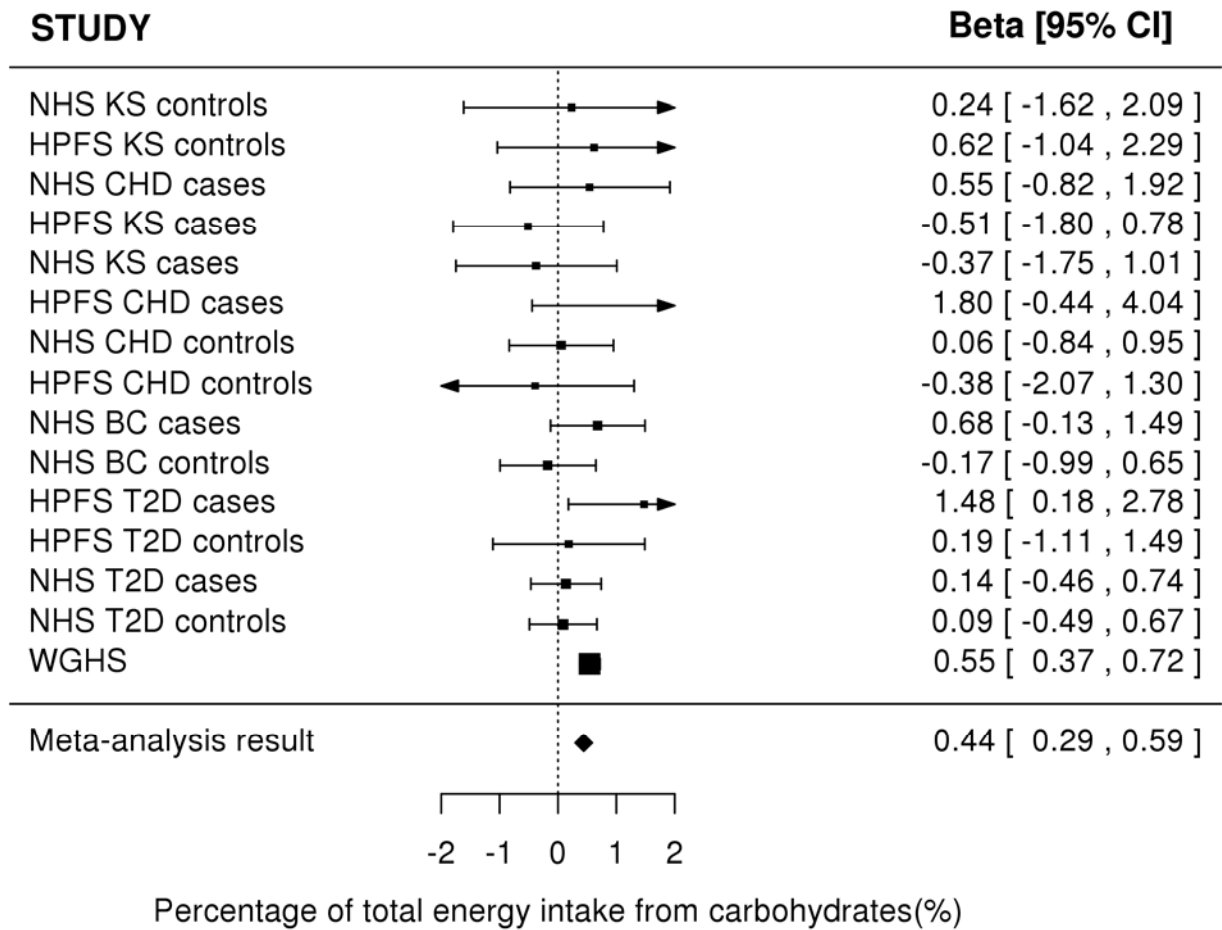

**Figure S2.** Manhattan plots of  $-\log_{10} P$  values from genome-wide association by meta-analysis for percentage of caloric intake from carbohydrates (a, b), protein (c, d), and fat (e, f). All regression models included basic adjustment for age, location and sub-population stratification measures (a-f). Additional adjustment for BMI was included for regression results shown in b, d and f. The threshold for genome-wide significance ( $P < 5 \times 10^{-8}$ ) is indicated by the red horizontal line in the Manhattan plot, and the threshold for sub-genome-wide significance is indicated by the blue horizontal line.

a.

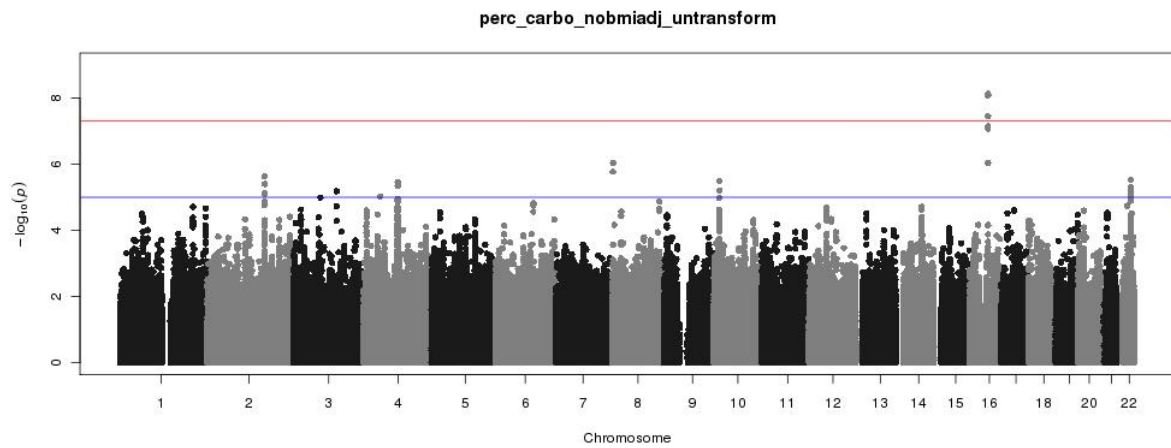

b.

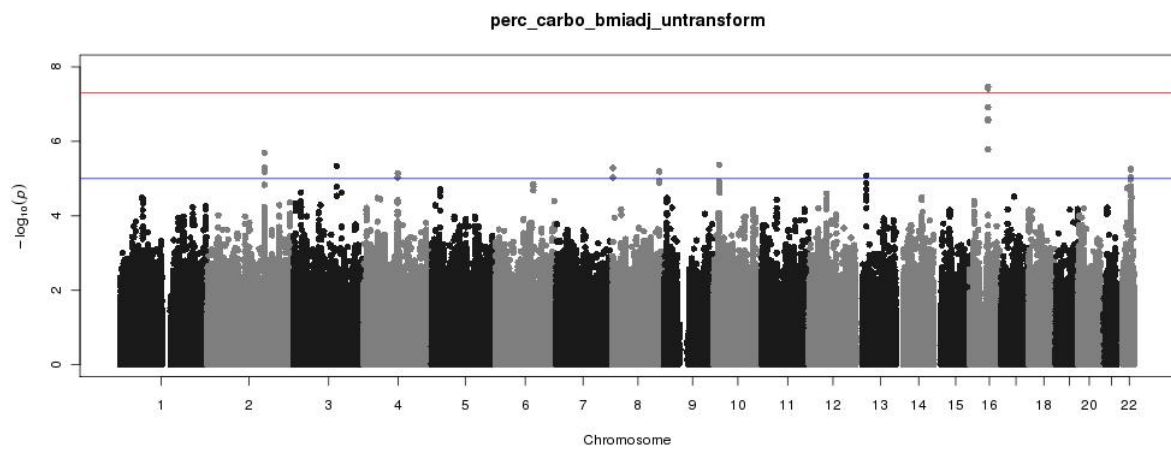

c.

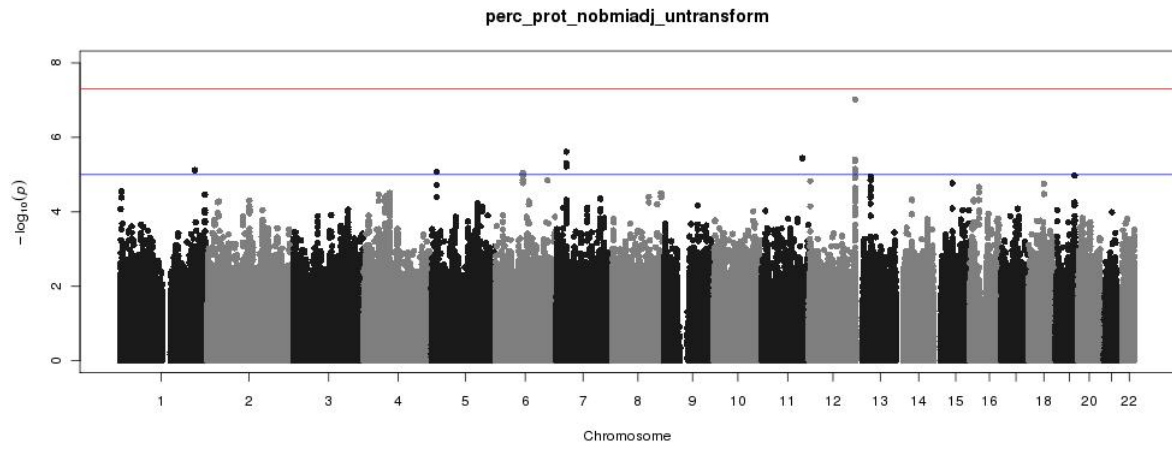

d

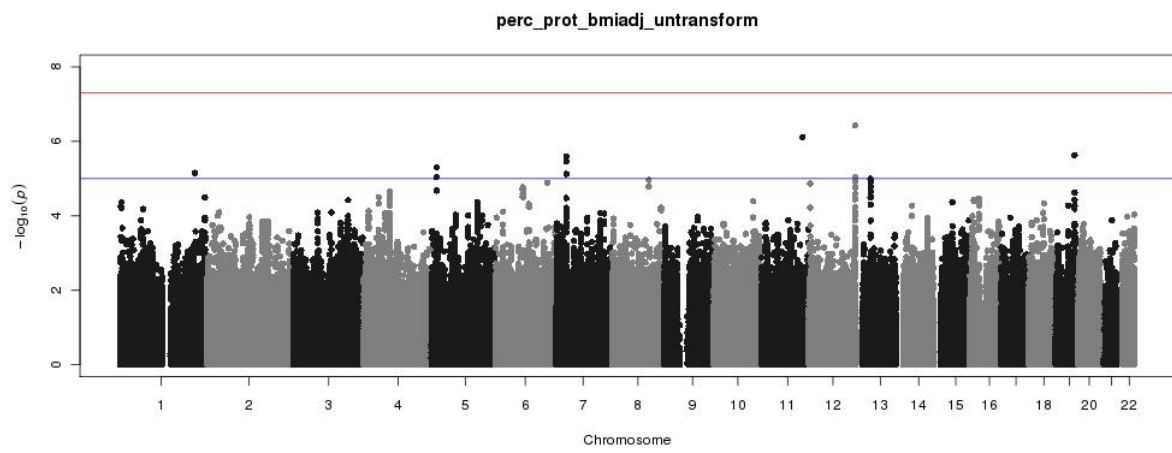

e.

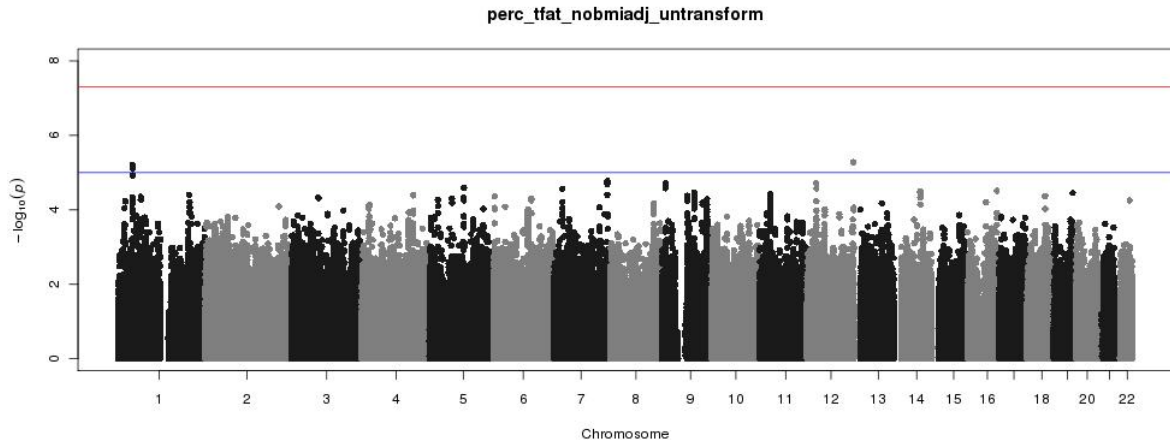

f.

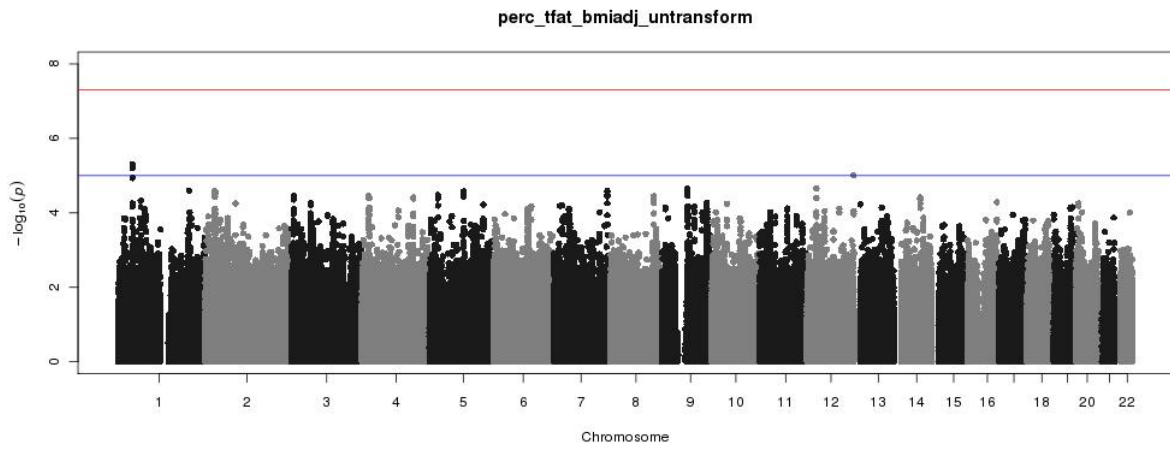

**Figure S3.** Distributions of macronutrient intake in the Women's Genome Health Study (WGHS). Residuals from percentage of total energy intake from A+D) carbohydrates, B+E) proteins, and C+F) fats adjusted for age, location, measures of population stratification, with (D-F) and without (A-C) adjustment for BMI.

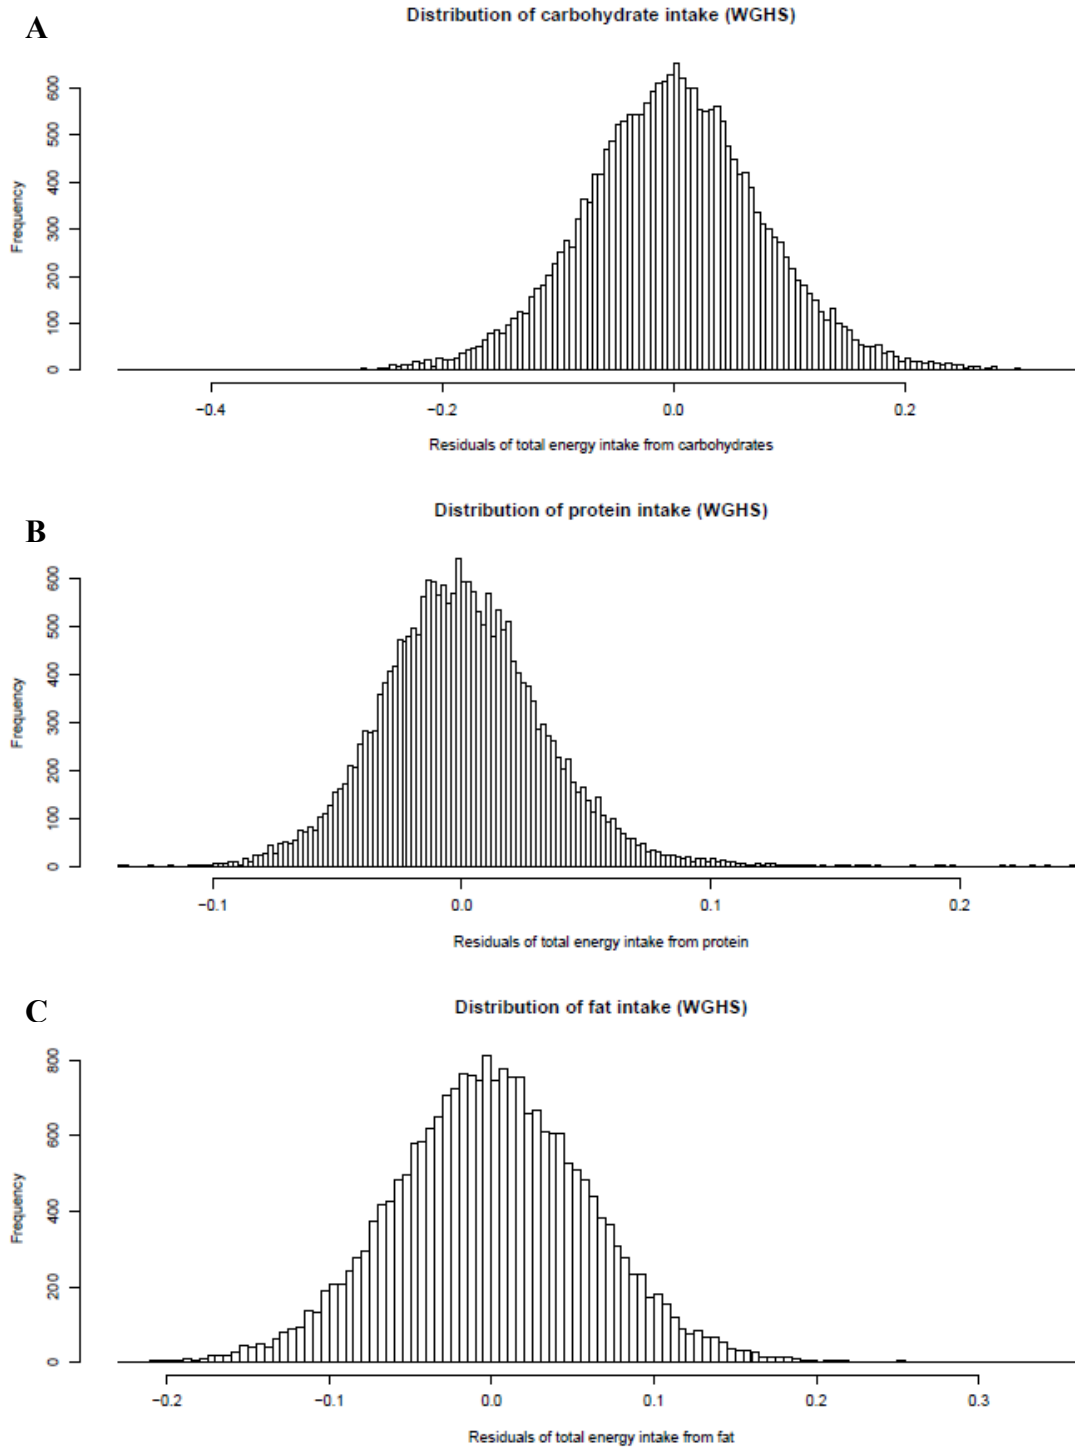

**D**

Distribution of carbohydrate intake (WGHS)

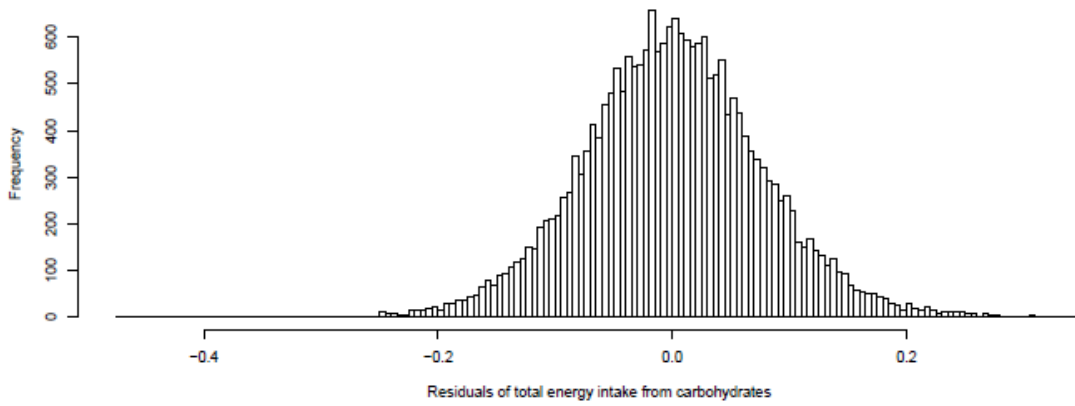

**E**

Distribution of protein intake (WGHS)

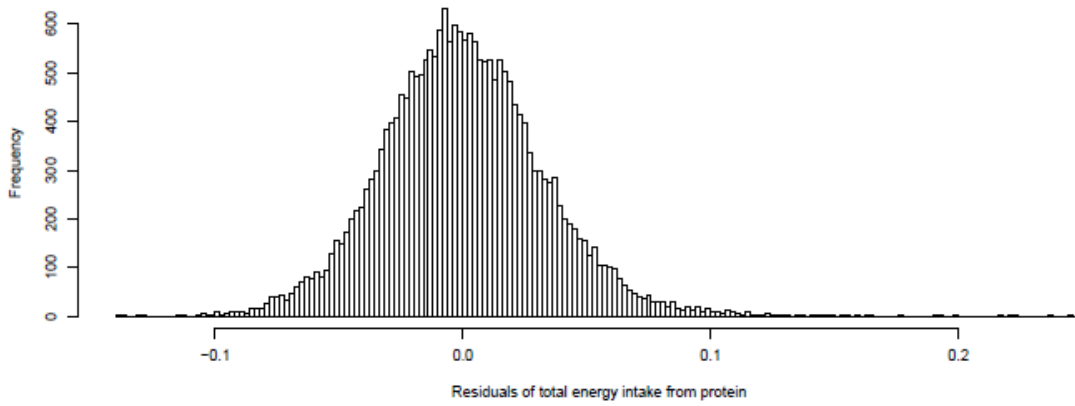

**F**

Distribution of fat intake (WGHS)

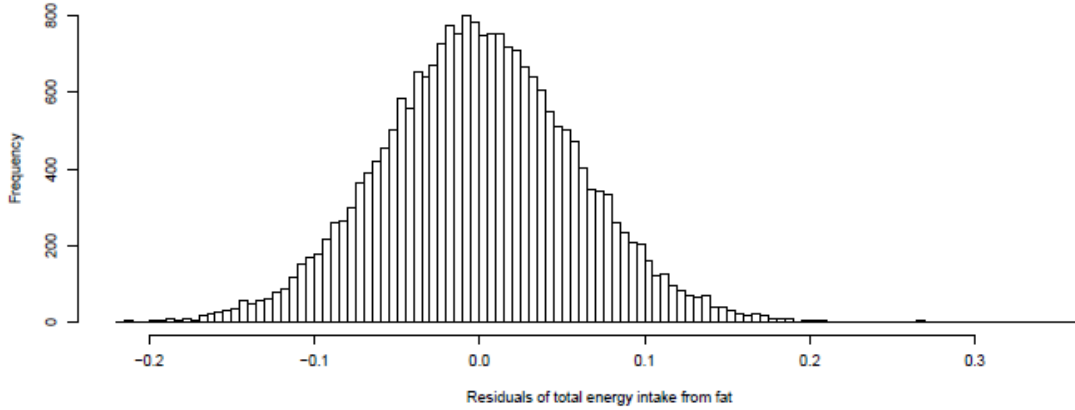

Supplement: supp_ddt032_ddt032supp.pdf [file supp_ddt032_ddt032supp.pdf]
